# Supplementary material
Source: PubMed Central journal article supplement (PMC6501783)
Supplement: NIHMS984276-supplement-Supplemental_Information.pdf [file NIHMS984276-supplement-Supplemental_Information.pdf]

## **Supporting Info:**

### **Experimental Measurement of Surface Charge Effects on the Stability of a Surface-Bound Biopolymer**

Herschel M. Watkins, Francesco Ricci and Kevin W. Plaxco

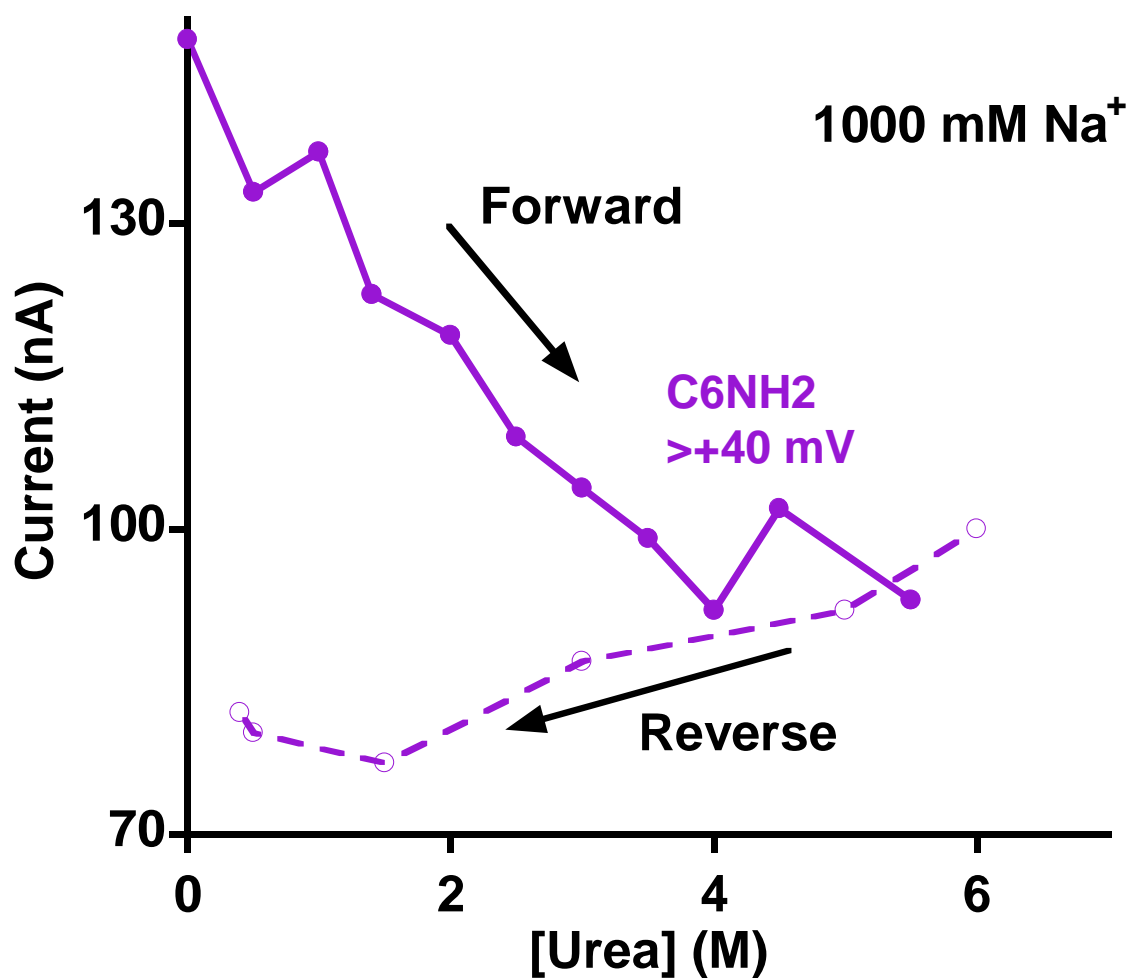

**Figure S1.** The stability of the surface-tethered stem loop is a strong function of the charge of the surface to which it is tethered. The stability of the stem-loop decreases as it is attached to surfaces of increasingly negative surface charge. (Fig. 2) In contrast, when the stem loop is attached to the positively charged surface of a C6NH2 SAM we do not observe any reversible urea-induced transition, even at very high ionic strength.
